# Supplementary material for: eQTL mapping in fetal-like pancreatic progenitor cells reveals early developmental insights into diabetes risk
Source: Springer Nature journal article supplement (doi:10.1038/s41467-023-42560-4), 2023-10-30
Supplement: MOESM19 [file 41467_2023_42560_MOESM19_ESM.pdf]

Reporting Summary

Nature Portfolio wishes to improve the reproducibility of the work that we publish. This form provides structure for consistency and transparency in reporting. For further information on Nature Portfolio policies, see our [Editorial Policies](#) and the [Editorial Policy Checklist](#).

Statistics

For all statistical analyses, confirm that the following items are present in the figure legend, table legend, main text, or Methods section.

|                          |                                                                                                                                                                                                                                                                                                |
|--------------------------|------------------------------------------------------------------------------------------------------------------------------------------------------------------------------------------------------------------------------------------------------------------------------------------------|
| n/a                      | Confirmed                                                                                                                                                                                                                                                                                      |
| <input type="checkbox"/> | <input checked="" type="checkbox"/> The exact sample size ( <i>n</i> ) for each experimental group/condition, given as a discrete number and unit of measurement                                                                                                                               |
| <input type="checkbox"/> | <input checked="" type="checkbox"/> A statement on whether measurements were taken from distinct samples or whether the same sample was measured repeatedly                                                                                                                                    |
| <input type="checkbox"/> | <input checked="" type="checkbox"/> The statistical test(s) used AND whether they are one- or two-sided<br><i>Only common tests should be described solely by name; describe more complex techniques in the Methods section.</i>                                                               |
| <input type="checkbox"/> | <input checked="" type="checkbox"/> A description of all covariates tested                                                                                                                                                                                                                     |
| <input type="checkbox"/> | <input checked="" type="checkbox"/> A description of any assumptions or corrections, such as tests of normality and adjustment for multiple comparisons                                                                                                                                        |
| <input type="checkbox"/> | <input checked="" type="checkbox"/> A full description of the statistical parameters including central tendency (e.g. means) or other basic estimates (e.g. regression coefficient) AND variation (e.g. standard deviation) or associated estimates of uncertainty (e.g. confidence intervals) |
| <input type="checkbox"/> | <input checked="" type="checkbox"/> For null hypothesis testing, the test statistic (e.g. <i>F</i> , <i>t</i> , <i>r</i> ) with confidence intervals, effect sizes, degrees of freedom and <i>P</i> value noted<br><i>Give P values as exact values whenever suitable.</i>                     |
| <input type="checkbox"/> | <input checked="" type="checkbox"/> For Bayesian analysis, information on the choice of priors and Markov chain Monte Carlo settings                                                                                                                                                           |
| <input type="checkbox"/> | <input checked="" type="checkbox"/> For hierarchical and complex designs, identification of the appropriate level for tests and full reporting of outcomes                                                                                                                                     |
| <input type="checkbox"/> | <input checked="" type="checkbox"/> Estimates of effect sizes (e.g. Cohen's <i>d</i> , Pearson's <i>r</i> ), indicating how they were calculated                                                                                                                                               |

Our web collection on [statistics for biologists](#) contains articles on many of the points above.

Software and code

Policy information about [availability of computer code](#)

|                 |                                                                                                                                                                                                                                                                                                                                                                        |
|-----------------|------------------------------------------------------------------------------------------------------------------------------------------------------------------------------------------------------------------------------------------------------------------------------------------------------------------------------------------------------------------------|
| Data collection | We used the following tools: R V.4.2.1; STAR V.2.7.3a; Gencode V.34lift37; sambamba V.0.6.7; biobambam2 V.2.0.95; RSEM V.1.2.20; CIBERSORTx website; bcftools V.1.9; limix V.3.0.4; plink 1.90b3x; bedtools V.2.27.1; numpy V.1.20.3; pandas V.1.3.5; samtools V.1.9<br>We used the following R packages: preprocessCore 1.58.0; coloc 5.1.0.1; peer 1.0; igraph 1.3.4 |
| Data analysis   | Scripts developed to perform this study are available in: <a href="https://github.com/jenniferngp/IPSC_PPC_eQTL_Project">https://github.com/jenniferngp/IPSC_PPC_eQTL_Project</a>                                                                                                                                                                                      |

For manuscripts utilizing custom algorithms or software that are central to the research but not yet described in published literature, software must be made available to editors and reviewers. We strongly encourage code deposition in a community repository (e.g. GitHub). See the Nature Portfolio [guidelines for submitting code & software](#) for further information.

Data

Policy information about [availability of data](#)

All manuscripts must include a [data availability statement](#). This statement should provide the following information, where applicable:

- Accession codes, unique identifiers, or web links for publicly available datasets
- A description of any restrictions on data availability
- For clinical datasets or third party data, please ensure that the statement adheres to our [policy](#)

The iPSC-PPC scRNA-seq and bulk RNA-seq data generated in this study have been deposited in the GEO database under accession codes GSE152610 and GSE182758, respectively. The WGS data used in this study for iPSCORE individuals were obtained as a VCF file from phs001325.v3. The reference gene annotation

file for aligning bulk RNA-seq data of iPSC-PPC were obtained from GENCODE release version 34 in GRCh37 as a GTF file ([https://www.gencodegenes.org/human/release\\_34.html](https://www.gencodegenes.org/human/release_34.html)). The bulk RNA-seq data for iPSC, adult islet, and adult whole pancreas samples used in PCA and pseudotime analyses were obtained from phs000924, GSE50398, and phs000424, respectively. eQTL summary statistics for adult whole pancreas and islet samples were obtained from the GTEx Data Repository (<https://console.cloud.google.com/storage/browser/gtex-resources>) and a previously published study 11 (<https://zenodo.org/record/3408356>), respectively. GWAS summary statistics were obtained from the Pan UK BioBank resource (<https://pan.ukbb.broadinstitute.org/>), the MAGIC (Meta-Analyses of Glucose and Insulin-related traits) Consortium (<https://magicinvestigators.org/downloads/>; <https://doi.org/10.1038/s41588-021-00852-9>), the DIAMANTE Consortium (<https://diagram-consortium.org/downloads.html>; <http://doi.org/10.1038/s41588-018-0241-6>), and a previously published study 3. Full summary statistics for all eQTLs, fine-mapping, and supporting data for figures and supplemental tables have been deposited in Figshare: [https://figshare.com/projects/Large-scale\\_eQTL\\_analysis\\_of\\_iPSC-PPC/156987](https://figshare.com/projects/Large-scale_eQTL_analysis_of_iPSC-PPC/156987).

## Research involving human participants, their data, or biological material

Policy information about studies with [human participants or human data](#). See also policy information about [sex, gender \(identity/presentation\), and sexual orientation](#) and [race, ethnicity and racism](#).

|                                                                    |    |
|--------------------------------------------------------------------|----|
| Reporting on sex and gender                                        | NA |
| Reporting on race, ethnicity, or other socially relevant groupings | NA |
| Population characteristics                                         | NA |
| Recruitment                                                        | NA |
| Ethics oversight                                                   | NA |

Note that full information on the approval of the study protocol must also be provided in the manuscript.

## Field-specific reporting

Please select the one below that is the best fit for your research. If you are not sure, read the appropriate sections before making your selection.

☒ Life sciences ☐ Behavioural & social sciences ☐ Ecological, evolutionary & environmental sciences

For a reference copy of the document with all sections, see [nature.com/documents/nr-reporting-summary-flat.pdf](https://nature.com/documents/nr-reporting-summary-flat.pdf)

## Life sciences study design

All studies must disclose on these points even when the disclosure is negative.

|                 |                                                                                                                                                                                                                          |
|-----------------|--------------------------------------------------------------------------------------------------------------------------------------------------------------------------------------------------------------------------|
| Sample size     | Our sample size for conducting iPSC-derived pancreatic progenitor eQTL analysis is 107, making it the largest eQTL study (as we currently know) on fetal developmental pancreatic cells.                                 |
| Data exclusions | No data was excluded.                                                                                                                                                                                                    |
| Replication     | Replication was not performed because it is not a standard procedure in eQTL studies.                                                                                                                                    |
| Randomization   | Randomization was not performed because it is not a standard procedure in eQTL studies. Covariates such as sex, sequencing quality and global ancestry were included in the linear mixed models developed in this study. |
| Blinding        | Blinding was not performed because it is not a standard procedure in eQTL studies.                                                                                                                                       |

## Reporting for specific materials, systems and methods

We require information from authors about some types of materials, experimental systems and methods used in many studies. Here, indicate whether each material, system or method listed is relevant to your study. If you are not sure if a list item applies to your research, read the appropriate section before selecting a response.

## Materials &amp; experimental systems

|                                     |                                                        |
|-------------------------------------|--------------------------------------------------------|
| n/a                                 | Involved in the study                                  |
| <input type="checkbox"/>            | <input checked="" type="checkbox"/> Antibodies         |
| <input checked="" type="checkbox"/> | <input type="checkbox"/> Eukaryotic cell lines         |
| <input checked="" type="checkbox"/> | <input type="checkbox"/> Palaeontology and archaeology |
| <input checked="" type="checkbox"/> | <input type="checkbox"/> Animals and other organisms   |
| <input checked="" type="checkbox"/> | <input type="checkbox"/> Clinical data                 |
| <input checked="" type="checkbox"/> | <input type="checkbox"/> Dual use research of concern  |
| <input checked="" type="checkbox"/> | <input type="checkbox"/> Plants                        |

## Methods

|                                     |                                                    |
|-------------------------------------|----------------------------------------------------|
| n/a                                 | Involved in the study                              |
| <input checked="" type="checkbox"/> | <input type="checkbox"/> ChIP-seq                  |
| <input type="checkbox"/>            | <input checked="" type="checkbox"/> Flow cytometry |
| <input checked="" type="checkbox"/> | <input type="checkbox"/> MRI-based neuroimaging    |

## Antibodies

|                 |                                                                                                                                                                                                                                                                                                                                                                                                                                                                           |
|-----------------|---------------------------------------------------------------------------------------------------------------------------------------------------------------------------------------------------------------------------------------------------------------------------------------------------------------------------------------------------------------------------------------------------------------------------------------------------------------------------|
| Antibodies used | PE Mouse anti-PDX1 Clone-658A5 (BD Biosciences; 1:10), Alexa Fluor 647 Mouse anti-NKX6.1 Clone R11-560 (BD Bioscience; 1:10), PE Mouse anti-IgG1 $\kappa$ R-PE Clone MOPC-21 (BD Biosciences), Alexa Fluor 647 Mouse anti IgG1 $\kappa$ Isotype Clone MOPC-21 (BD Biosciences).                                                                                                                                                                                           |
| Validation      | Both PE Mouse anti-PDX1 Clone-658A5 (BD Biosciences) and Alexa Fluor 647 Mouse anti-NKX6.1 Clone R11-560 (BD Bioscience) were validated by the manufacturer; they were found to be reactive with both mouse and human PDX-1 and NKX6-1, respectively. We also used the appropriate class control in our experiments: PE Mouse anti-IgG1 $\kappa$ R-PE Clone MOPC-21 (BD Biosciences) and Alexa Fluor 647 Mouse anti IgG1 $\kappa$ Isotype Clone MOPC-21 (BD Biosciences). |

## Flow Cytometry

## Plots

Confirm that:

- ☒ The axis labels state the marker and fluorochrome used (e.g. CD4-FITC).
- ☒ The axis scales are clearly visible. Include numbers along axes only for bottom left plot of group (a 'group' is an analysis of identical markers).
- ☒ All plots are contour plots with outliers or pseudocolor plots.
- ☒ A numerical value for number of cells or percentage (with statistics) is provided.

## Methodology

|                           |                                                                                                                                                                                                                                                                                                                                                                                                                                                                                                                                                                                                                                                                                                                                                                                                                                                                                                                                         |
|---------------------------|-----------------------------------------------------------------------------------------------------------------------------------------------------------------------------------------------------------------------------------------------------------------------------------------------------------------------------------------------------------------------------------------------------------------------------------------------------------------------------------------------------------------------------------------------------------------------------------------------------------------------------------------------------------------------------------------------------------------------------------------------------------------------------------------------------------------------------------------------------------------------------------------------------------------------------------------|
| Sample preparation        | At least $2 \times 10^6$ cells were fixed and permeabilized using the Fixation/Permeabilized Solution Kit with BD GolgiStop TM (BD Biosciences) following the manufacturer's recommendations. Cells were resuspended in 1x BD Perm/Wash TM Buffer at a concentration of $1 \times 10^7$ cells/ml. For each flow cytometry staining, $2.5 \times 10^5$ cells were stained for 75 minutes at room temperature with PE Mouse anti-PDX1 Clone-658A5 (BD Biosciences; 1:10) and Alexa Fluor 647 Mouse anti-NKX6.1 Clone R11-560 (BD Bioscience; 1:10), or with the appropriate class control antibodies: PE Mouse anti-IgG1 $\kappa$ R-PE Clone MOPC-21 (BD Biosciences) and Alexa Fluor 647 Mouse anti IgG1 $\kappa$ Isotype Clone MOPC-21 (BD Biosciences). Stained cells were washed three times, resuspended in PBS containing 1% BSA and 1% formaldehyde, and immediately analyzed using FACS Canto II flow cytometer (BD Biosciences). |
| Instrument                | FACS Canto II flow cytometer (BD Biosciences)                                                                                                                                                                                                                                                                                                                                                                                                                                                                                                                                                                                                                                                                                                                                                                                                                                                                                           |
| Software                  | FlowJo software version 10.4                                                                                                                                                                                                                                                                                                                                                                                                                                                                                                                                                                                                                                                                                                                                                                                                                                                                                                            |
| Cell population abundance | Double-positive PDX1+ and NKX6-1+ cells ranged from 9.4% to 93.1% (median: 74%) across the 107 iPSC-derived pancreatic progenitor samples. Cell population abundance was accounted for in the eQTL analysis.                                                                                                                                                                                                                                                                                                                                                                                                                                                                                                                                                                                                                                                                                                                            |
| Gating strategy           | Single cells were selected based on the Forward scatter and Side scatter and all debris, and double cells were excluded. Next, for each flow cytometry staining experiment, cells were stained with individual appropriate class control antibodies: PE Mouse anti-IgG1 $\kappa$ R-PE Clone MOPC-21 (BD Biosciences) and Alexa Fluor 647 Mouse anti IgG1 $\kappa$ Isotype Clone MOPC-21 (BD Biosciences) to set up the PDX1 and NKX6.1 double positive cells quadrant gating.                                                                                                                                                                                                                                                                                                                                                                                                                                                           |

- ☒ Tick this box to confirm that a figure exemplifying the gating strategy is provided in the Supplementary Information.
